# Supplementary material for: A R2R3 MYB Transcription Factor, TaMYB391, Is Positively Involved in Wheat Resistance to Puccinia striiformis f. sp. tritici
Source: MDPI journal article supplement (doi:10.3390/ijms232214070), 2022-11-15
Supplement: s1 [file s1]

## Supplementary Data

# A R2R3 MYB Transcription Factor, *TaMYB391*, Is Positively Involved in Wheat Resistance to *Puccinia striiformis* f. sp. *tritici*

Mehari Desta Hawku <sup>1,2,†</sup>, Fuxin He <sup>1,†</sup>, Xingxuan Bai <sup>1</sup>, Md Ashraful Islam <sup>1</sup>, Xueling Huang <sup>1</sup>, Zhensheng Kang <sup>1,\*</sup> and Jun Guo <sup>1,\*</sup>

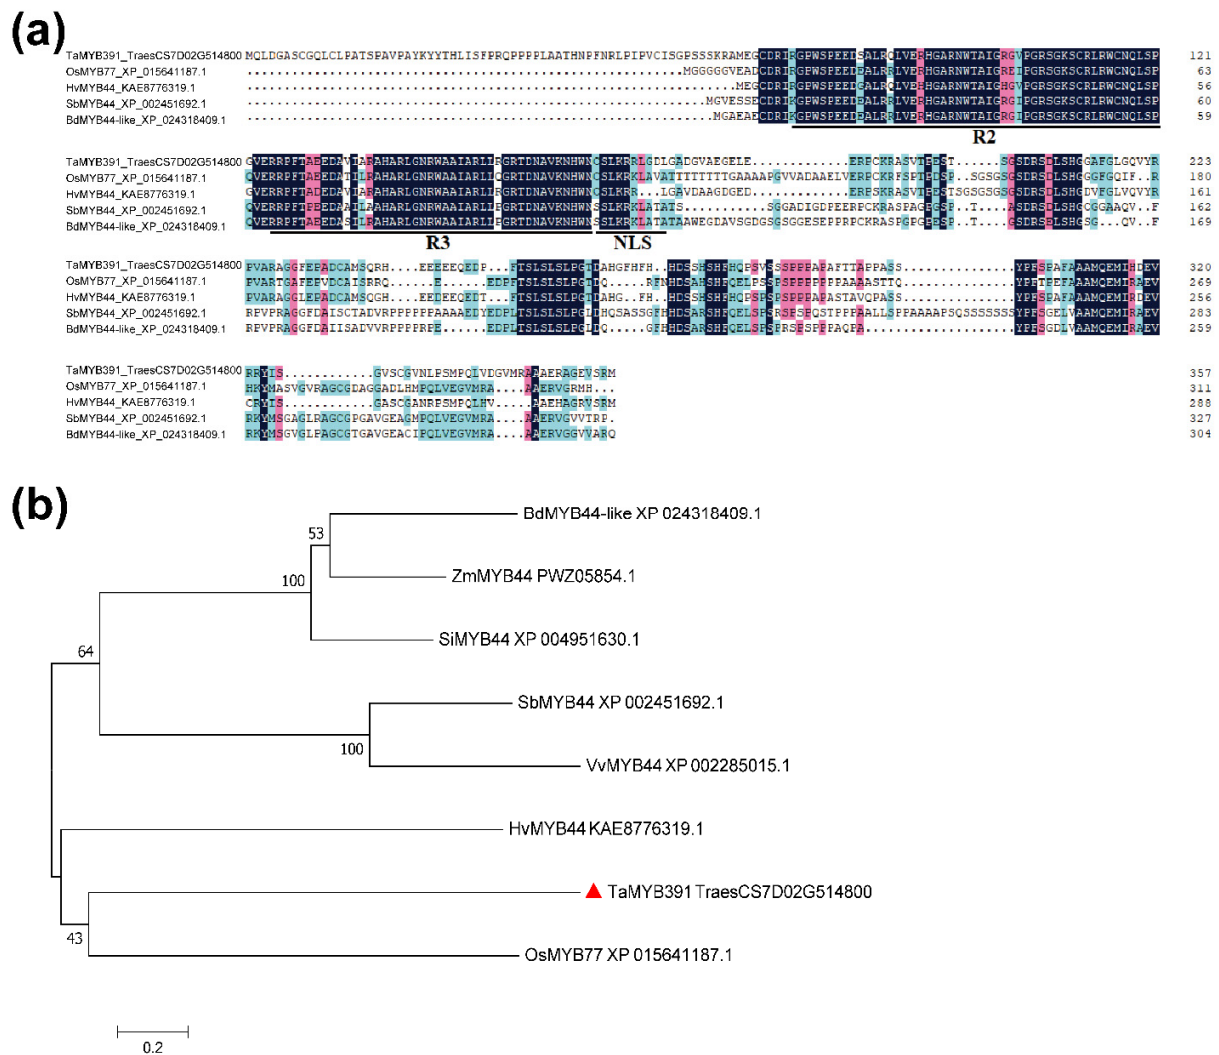

**Figure S1.** Multisequence alignment and phylogenetic analysis of the deduced amino acid sequences of *TaMYB391* with other plant species. **(a)** Multisequence alignment of *TaMYB391* with other plant species. Comparison of amino acid sequences of *Triticum aestivum* (*TaMYB391*) with MYB genes from *Oryza sativa* (GenBank accession No. XP\_015641187.1), *Hordeum vulgare* (GenBank accession No. KAE8776319.1), *Sorghum bicolor* (GenBank accession No. XP\_002451692.1) and *Brachypodium distachyon* (GenBank accession No. XP\_024318409.1). Conserved residues through all organisms are shown in black (100%), pink (75–100%) and light blue (50–75%), respectively. Sequences alignment was performed using DNAMAN8.0 (Lynnsoft Biosoft, San Ramon, QC, Canada). **(b)** Phylogenetic analysis of the deduced amino acid sequences of *TaMYB391* with other plant species. Ta, *Triticum aestivum*; Os, *Oryza sativa*; Bd, *Brachypodium distachyon*; Hv, *Hordeum vulgare*; Sb, *Sorghum bicolor*; Zm, *Zea mays*; Si, *Setaria italica*; Vv, *Vitis vinifera*.

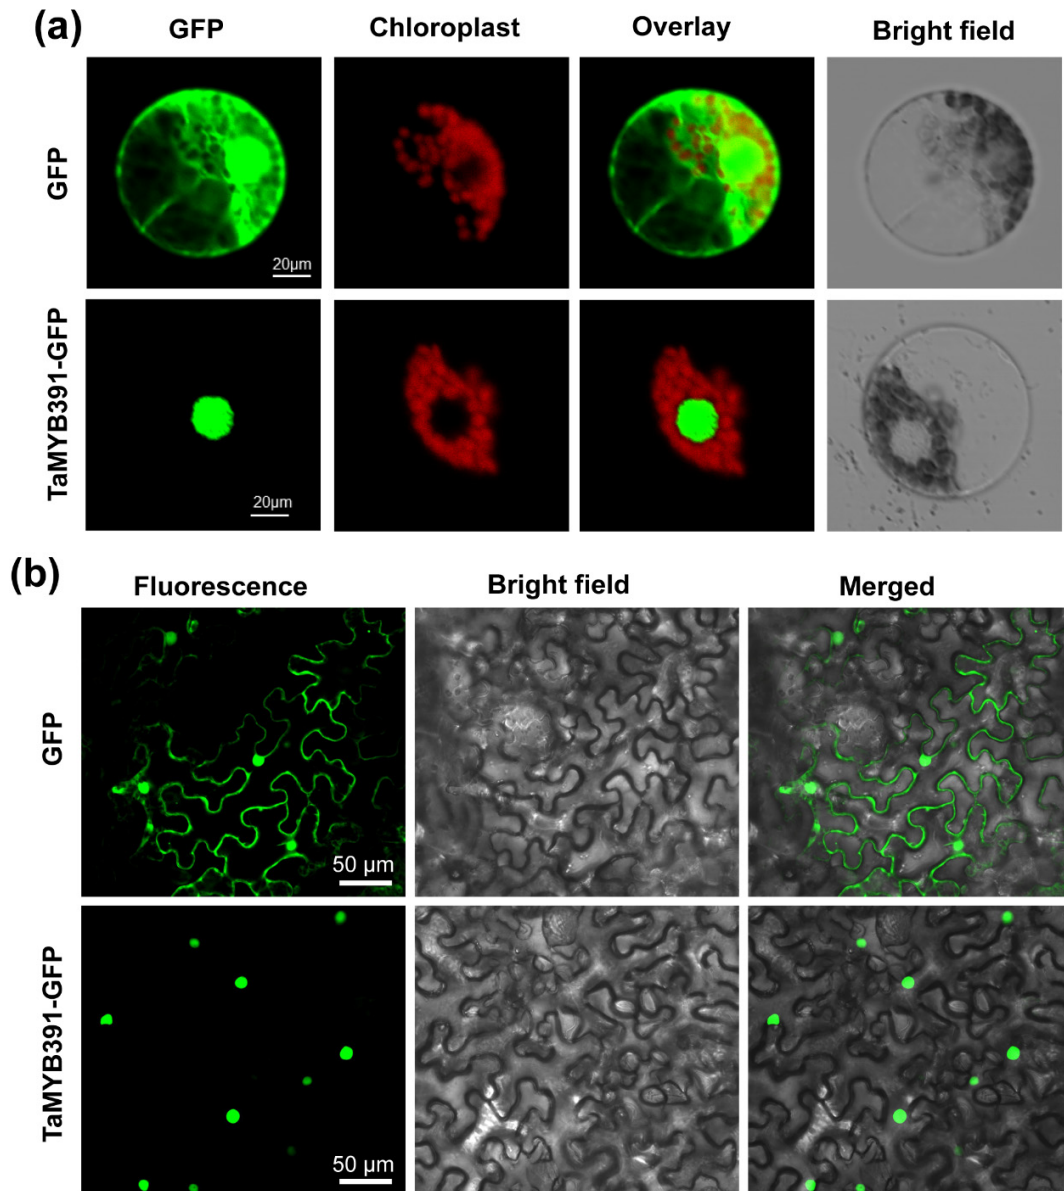

**Figure S2.** *TaMYB391* is localized in the nucleus. (a) p16318hGFP:*TaMYB391* fused proteins were overexpressed in wheat protoplasts through PEG-mediated transfection method. GFP (green fluorescence protein) was used as a control. (b) pCAMBIA1302:*TaMYB391*-GFP fused proteins were overexpressed in tobacco through *Agrobacterium*-mediated transformation. The constructs, GFP or *TaMYB391*-GFP, were first introduced into *A. tumefaciens* then agroinfiltrated into *N. benthamiana* leaves. GFP signals were observed with an Olympus FV1000 confocal microscope with 488 nm filter.

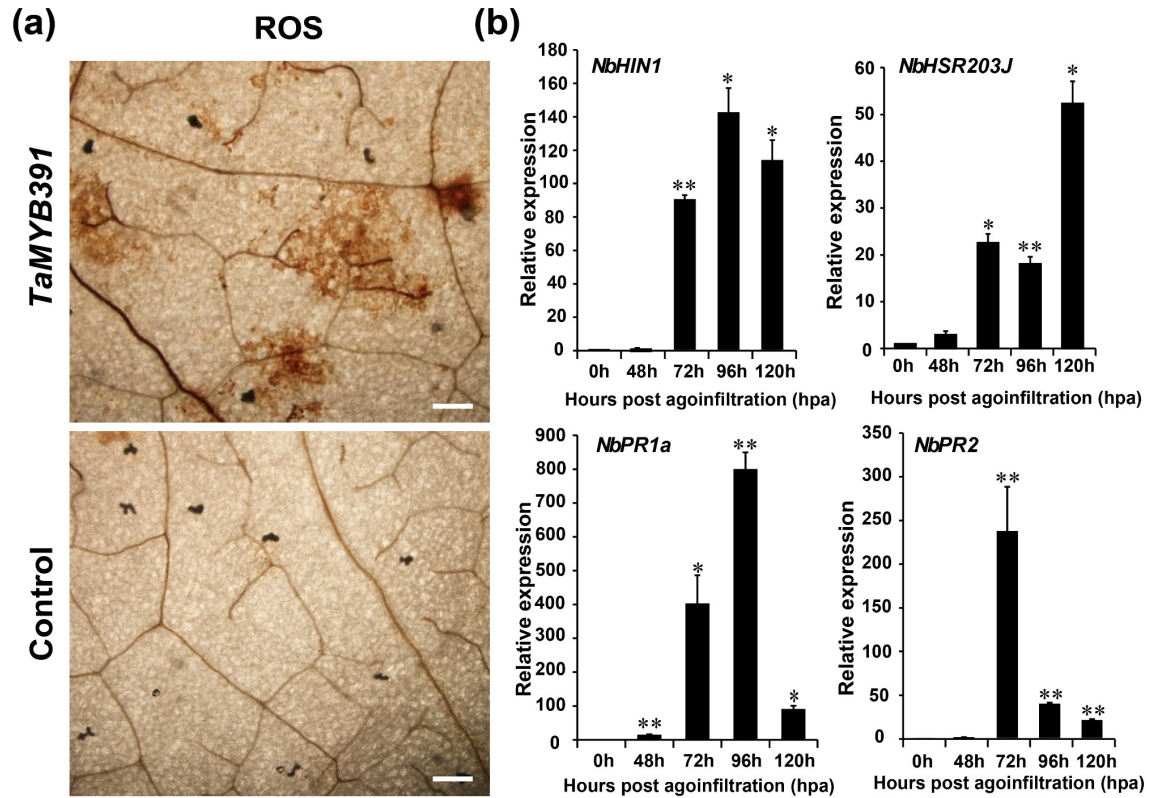

**Figure S3.** Transient overexpression of *TaMYB391* induces ROS accumulation and expression of HR- and defense-related marker genes in *N. benthamiana*. *TaMYB391* triggers plant immunity response in *N. benthamiana*. (a) Reactive oxygen species (ROS) accumulation in *N. benthamiana*. *A. tumefaciens* cells carrying PVX: *TaMYB391* or PVX: *GFP* were infiltrated into *N. benthamiana* leaves. *A. tumefaciens* cells carrying PVX: *GFP* were used as control. Bar, 200µm. (b) Relative expression of hypersensitive-response (HR) specific- and defense-related- marker genes in *N. benthamiana*. *NbActin* was used as the internal reference gene. Relative expression of genes tested was normalized to *NbActin*. The quantitative RT-PCR values are presented as fold changes relative to that in control leaves at the same time. Means and SEs were computed from three replicates. The statistical analyses were performed with Student's *t*-test. Bars indicate  $\pm$  SE. \*,  $p < 0.05$ ; \*\*,  $p < 0.01$ .

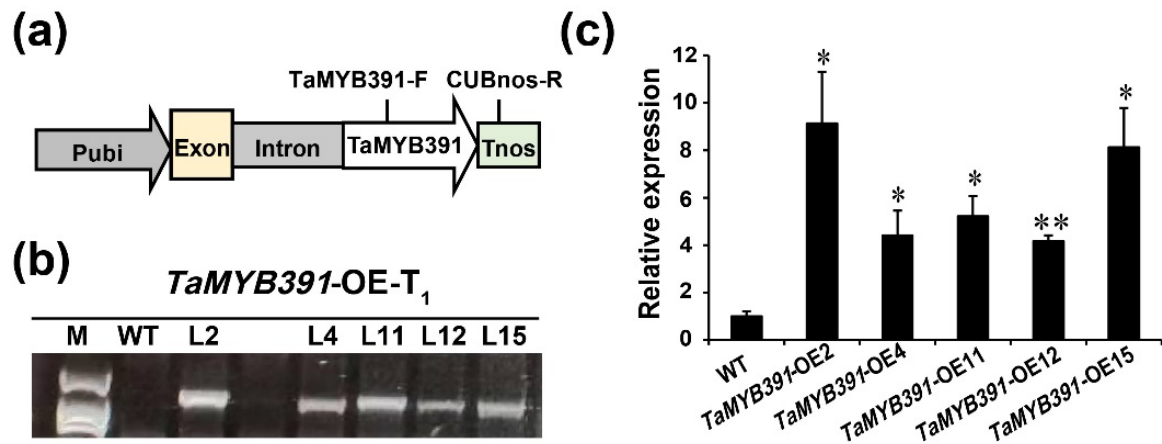

**Figure S4.** PCR and RT-qPCR assays to identify the positive T<sub>1</sub> *TaMYB391*-overexpression transgenic lines. (a) Scheme of the transformation vector pCUB: *TaMYB391*. The expression of *TaMYB391* was driven by Pubi and terminated by Tnos. Pubi: maize ubiquitin promoter; Tnos: terminator of *A. tumefaciens* nopaline synthase gene. The primers used to check the positive transformants by PCR are indicated on the top of the schema. (b) Five successfully transformed transgenic lines were detected in T<sub>1</sub> generation using PCR. M: molecular marker; WT: wild type. (c) Transcription levels of five positive lines in T<sub>1</sub> generation analyzed through RT-qPCR. The data were normalized with the transcripts of the reference gene, *TaEF-1α*, and expressed as fold changes relative to WT. Means and SEs were computed from three replicates. The statistical analyses were performed with Student's *t*-test. Bars indicate ± SE. \*, *p* < 0.05; \*\*, *p* < 0.01.

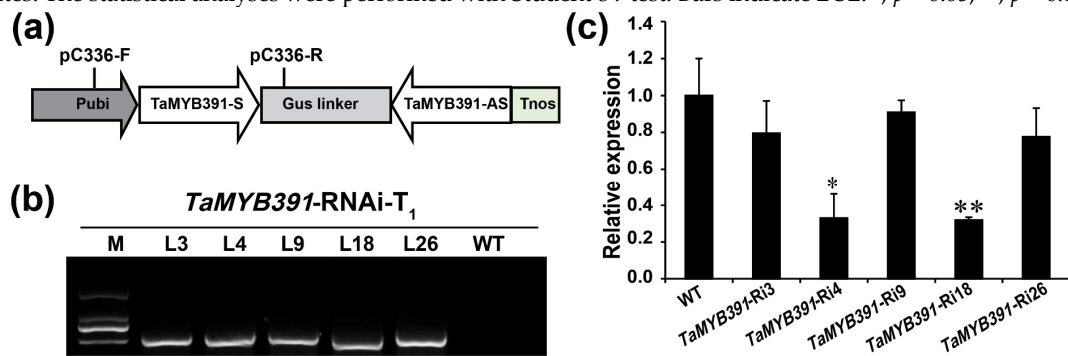

**Figure S5.** PCR and RT-qPCR assays to identify the positive T<sub>1</sub> *TaMYB391*-RNAi transgenic lines. (a) Scheme of the *TaMYB391*-RNAi vector. The specific fragment derived from *TaMYB391* in the sense (S) and antisense (AS) orientations was constructed such that the gus linker sequence was inserted between the S and AS sequences. The expression was driven by Pubi and terminated by Tnos. Pubi: maize ubiquitin promoter; Tnos: terminator of *A. tumefaciens* nopaline synthase gene. The primers used to check the positive transformants by PCR are indicated on the top of the schema. (b) Five successfully transformed transgenic lines were detected in T<sub>1</sub> generation using PCR. M, molecular marker; WT, wild type. (c) Transcription levels of five positive lines in T<sub>1</sub> generation analyzed through RT-qPCR. The data were normalized with the transcripts of the reference gene, *TaEF-1α*, and expressed as fold changes relative to WT. Means and SEs were computed from three replicates. The statistical analyses were performed with Student's *t*-test. Bars indicate ± SE. \*, *p* < 0.05; \*\*, *p* < 0.01.

**Table S1.** Primers used in this study.

| Purpose                                                             | Name                  | Sequence 5' to 3'                                                                              |
|---------------------------------------------------------------------|-----------------------|------------------------------------------------------------------------------------------------|
| Gene amplification                                                  | TaMYB391-F            | ATGCAGTTGGATGGGGCCTCGT                                                                         |
|                                                                     | TaMYB391-R            | TCACCGCATCCTCGAGACTTCGC                                                                        |
| Cloning of TaMYB391 to CUB vector for overexpression in wheat       | CUB-TaMYB391-F        | caggtcgactctagaggatccATGCAGTTGGATGGGGCC                                                        |
|                                                                     | CUB-TaMYB391-R        | gagctcgggtaccggggatccTCACTTATCATCATCATCCTTATAATCTCCCTTATCATCATCATCCTTATAATCCCGCATCCTCGAGACTTCG |
| For validating positive transformant of TaMYB391-Overexpression     | TaMYB391-F            | ATGCAGTTGGATGGGGCC                                                                             |
|                                                                     | CUBnos-R              | TTTGAACGATCGGGGAAATTC                                                                          |
| Cloning of TaMYB391-RNAi fragment to p336 vector                    | pC336-TaMYB391-F      | TTTCGAGCCGGCGGACTGC                                                                            |
|                                                                     | pC336-TaMYB391-R      | GGCGCGGTGGTGAACGCT                                                                             |
| For validating the positive transformants of TaMYB391-RNAi fragment | pc336-F               | TTTAGCCCTGCCTTCATACG                                                                           |
|                                                                     | pc336-R               | CACGCAAGTCCGCATCTTCA                                                                           |
| RT-qPCR in wheat                                                    | TaMYB391-RT-qPCR-F    | CATGAGCCAGCGACACGA                                                                             |
|                                                                     | TaMYB391-RT-qPCR-R    | CGGCGACGAGGAAACAGA                                                                             |
|                                                                     | TaPR1-F               | GAGAATGCAGACGCCCAAGC                                                                           |
|                                                                     | TaPR1-R               | CTGGAGCTTGCAGTCGTTGATC                                                                         |
|                                                                     | TaPR2-F               | AGGATGTTGCTTCCATGTTTGCCG                                                                       |
|                                                                     | TaPR2-R               | AAGTAGATGCGCATGCCGTTGATG                                                                       |
|                                                                     | TaCAT-F               | GCCCAAGTGCTCCCACCACAACA                                                                        |
|                                                                     | TaCAT-R               | TGAGGGTGCGGGAGGGGATG                                                                           |
|                                                                     | TaEF-1 $\alpha$ -F    | TGGTGTCAATCAAGCCTGGTATGGT                                                                      |
|                                                                     | TaEF-1 $\alpha$ -R    | ACTCATGGTGCATCTCAACGGACT                                                                       |
| Biomass ratio analysis                                              | TaEF-1 $\alpha$ -F    | TGGTGTCAATCAAGCCTGGTATGGT                                                                      |
|                                                                     | TaEF-1 $\alpha$ -R    | ACTCATGGTGCATCTCAACGGACT                                                                       |
|                                                                     | PstEF-F               | TTTCGCCGTCCGTGATATGAGACAA                                                                      |
|                                                                     | PstEF-R               | ATGCGTATCATGGTGGTGGAGTGA                                                                       |
| RT-qPCR in <i>N. benthamiana</i>                                    | NbHIN1-F              | CCAACTTGAACGGAGCCTATTA                                                                         |
|                                                                     | NbHIN1-R              | AGGCATCCAAAGAGACAACCTAC                                                                        |
|                                                                     | NbHSR203J-F           | ACGCAGATTTCAACCGAGTAT                                                                          |
|                                                                     | NbHSR203J-R           | GCCAGTCGCATTGGAGATAA                                                                           |
|                                                                     | NbPR1a-F              | CCGCCTTCCCTCAACTCAAC                                                                           |
|                                                                     | NbPR1a-R              | GCACAACCAAGACGTAAGTGA                                                                          |
|                                                                     | NbPR2-F               | AGGTGTTTGCTATGGAATGC                                                                           |
|                                                                     | NbPR2-R               | TCTGTACCCACCATCTTGC                                                                            |
| Overexpression in Tobacco                                           | TaMYB391-PVX-F        | tcagcaccagctagcatcgatATGCAGTTGGATGGGGCC                                                        |
|                                                                     | TaMYB391-PVX-R        | aaccgttcacggcggtcgacCCGCATCCTCGAGACTTCG                                                        |
| Subcellular localization in wheat                                   | TaMYB391-p16318hGFP-F | gacgatatctctagaggatccATGCAGTTGGATGGGGCC                                                        |
|                                                                     | TaMYB391-p16318hGFP-R | gcccttgctcaccatggatccCCGCATCCTCGAGACTTCG                                                       |
| Subcellular localization in tobacco                                 | TaMYB391-1302-F       | CATGGTAGATCTGACTAGTATGCAGTTGGATGGGGCC                                                          |
|                                                                     | TaMYB391-1302-R       | GCCCTTGCTCACCATCCTAGGCCGCATCCTCGAGACTTCG                                                       |
